# Supplementary material for: Association of Antipsychotic Polypharmacy vs Monotherapy With Psychiatric Rehospitalization Among Adults With Schizophrenia
Source: PubMed Central journal article supplement (PMC6495354; doi:10.1001/jamapsychiatry.2018.4320), 2019-02-20
Supplement: jamapsychiatry-76-499-s001.pdf [file jamapsychiatry-76-499-s001.pdf]

## Supplementary Online Content

Tiihonen J, Taipale H, Mehtälä J, Vattulainen P, Correll CU, Tanskanen A. Association of antipsychotic polypharmacy vs monotherapy with psychiatric rehospitalization among adults with schizophrenia. *JAMA Psychiatry*. Published online February 20, 2019. doi:10.1001/jamapsychiatry.2018.4320

**eMethods.** Population and Exposure

**eTable 1.** Covariate Definitions

**eTable 2.** Median Doses of Antipsychotics in Defined Daily Doses (DDD) and Milligrams (mg), With Interquartile Ranges (IQRs)

**eTable 3.** Risk of Psychiatric Hospitalization During Specific Treatments Compared With No Antipsychotic Use in the Prevalent Cohort (Within-Individual Analysis)

**eTable 4.** The Effect Of Adding Any Other Antipsychotic on Top of Aripiprazole, Clozapine, Olanzapine, Quetiapine, and Risperidone Monotherapy

**eTable 5.** Risk of Psychiatric Hospitalization During Specific Treatments Compared With No Antipsychotic Use in the Prevalent Cohort (Within-Individual Analysis Conservatively Defined Polypharmacy)

**eTable 6.** Risk of All-Cause Hospitalization During Specific Treatments Compared With No Antipsychotic Use in the Prevalent Cohort (Within-Individual Analysis)

**eTable 7.** Risk of Psychiatric Hospitalization During Specific Treatments Compared With No Antipsychotic Use in the Incident Cohort (Within-Individual Analysis)

**eTable 8.** Risk of Somatic Hospitalization During Specific Treatments Compared With No Antipsychotic Use (Within-Individual Analysis)

**eTable 9.** Risk Of Death During Specific Antipsychotic Treatments Compared With No Use of Antipsychotic in the Total Cohort (Between-Individual Analysis)

**eTable 10.** Risk of Psychiatric Hospitalization During Specific Antipsychotic Treatments Compared With No Use of Antipsychotic in the Total Cohort (Between-Individual Analysis)

**eTable 11.** Risk of Psychiatric Re-Hospitalization During Specific Treatments Compared With No Antipsychotic Treatment in the Incident Cohort (Between-Individual Analyses)

**eFigure 1.** Restructuring of Data for Within Individual Analyses

**eFigure 2.** Risk of Psychiatric Hospitalization During Specific Treatments Compared With No Antipsychotic Use in the Prevalent Cohort (Within-Individual Analysis)

**eFigure 3.** Risk of All-Cause Hospitalization During Specific Treatments Compared With No Antipsychotic Use in the Prevalent Cohort (Within-Individual Analysis)

**eFigure 4.** Risk of Somatic Hospitalization During Specific Treatments Compared With No Antipsychotic Use (Within-Individual Analysis)

**eFigure 5.** Risk of Death During Specific Antipsychotic Treatments Compared With No Use of Antipsychotic in the Total Cohort (Between-Individual Analysis)

**eFigure 6.** Risk of Psychiatric Hospitalization During Specific Antipsychotic Treatments Compared With No Use of Antipsychotic in the Total Cohort (Between-Individual Analysis)

**eFigure 7.** Risk of Psychiatric Re-Hospitalization During Specific Treatments Compared With No Antipsychotic Treatment in the Incident Cohort (Between-Individual Analyses)

This supplementary material has been provided by the authors to give readers additional information about their work.

## **eMethods. Population and Exposure**

### **Study population**

In Finland, all individuals have a unique personal identity code which was used in the data linkage between databases. Schizophrenia was defined by discharge diagnosis (ICD-10 codes F20, F25; and ICD-9 and ICD-8 codes 295\*). Altogether 81,043 persons were hospitalized due to schizophrenia during the study period. After exclusions for diagnoses of dementia (N=1,166 before or at the same time of a schizophrenia diagnosis), those who died during the first hospitalization (N=2,599) and those who died before January 1, 1996 (the time when the incident cohort started and when the follow-up began for the prevalent cohort) (N=15,028), the final prevalent cohort included 62,250 persons with schizophrenia. The incident cohort included persons hospitalized for the first time due to schizophrenia during 1996-2014 (N=23,499) but who had not used antipsychotic drugs during at least one year preceding the index hospitalization, resulting in 8,719 incident cases. The characteristics of this cohort have been reported in previous studies.<sup>1,2</sup>

### **Exposure**

Definition of drug use periods in the PRE2DUP method is based on sliding averages of daily dose and regularity of dispensations; hospitalizations and possible stockpiling of drugs are taken into account. For this study, the modelling was conducted based on drug formulation (according to package information) to separate antipsychotic substances as oral and long-acting injections (LAI). Overlapping use periods were combined to derive time when “any LAI” was used. Oral risperidone, quetiapine, clozapine, olanzapine and aripiprazole were considered separately, and all other orals were pooled together. Since two antipsychotic treatments overlapping are often related to switch and not to actual concomitant use, we also conducted a sensitivity analysis omitting the first 90 days in each polypharmacy and monotherapy treatment period (“conservatively defined polypharmacy” analysis).

**eTable 1.** Covariate Definitions.

| <b>Covariate: definition</b>                                                                                                                                                                                                                                                                                                                                                                                                                                                                                                                                                                                                                                                                                                                                                                                                                                                                                                                                                                                                                                                                                                                                                                                                                                                         | <b>Models utilizing the variable</b> |
|--------------------------------------------------------------------------------------------------------------------------------------------------------------------------------------------------------------------------------------------------------------------------------------------------------------------------------------------------------------------------------------------------------------------------------------------------------------------------------------------------------------------------------------------------------------------------------------------------------------------------------------------------------------------------------------------------------------------------------------------------------------------------------------------------------------------------------------------------------------------------------------------------------------------------------------------------------------------------------------------------------------------------------------------------------------------------------------------------------------------------------------------------------------------------------------------------------------------------------------------------------------------------------------|--------------------------------------|
| <b>Covariates in within-individual models</b>                                                                                                                                                                                                                                                                                                                                                                                                                                                                                                                                                                                                                                                                                                                                                                                                                                                                                                                                                                                                                                                                                                                                                                                                                                        |                                      |
| <b>Order of treatments:</b> continuously updated in the models, categorized as no treatment, 1st, 2nd, 3rd, >3 <sup>rd</sup>                                                                                                                                                                                                                                                                                                                                                                                                                                                                                                                                                                                                                                                                                                                                                                                                                                                                                                                                                                                                                                                                                                                                                         | WI, TC                               |
| <b>Time since cohort entry:</b> continuously updated in the models, categorized as 0–1, 1–3, >3 years                                                                                                                                                                                                                                                                                                                                                                                                                                                                                                                                                                                                                                                                                                                                                                                                                                                                                                                                                                                                                                                                                                                                                                                | WI                                   |
| <b>Exposure to other psychotropic medications:</b> Continuously updated variables, each having status “never” until the first purchase of a specific drug occurred. After the first purchase, exposure was “current use” if prior purchases determined that exposure was still on-going and “past use” otherwise (prior purchases too far away in the past). Corresponding ATC codes:<br><ul style="list-style-type: none"> <li>- Antidepressants: N06A</li> <li>- Benzodiazepines and related drugs: N05BA 01–22, N05CD, N05CF, N03AE01</li> <li>- Lithium N05AN01</li> <li>- Mood stabilizers: N03AG01, N03AF01, N03AF02, N03AX09, N03AX12, N03AX11</li> <li>- Sedatives: N05C</li> </ul>                                                                                                                                                                                                                                                                                                                                                                                                                                                                                                                                                                                          | WI, TC                               |
| <b>Covariates included only in between-individual models</b>                                                                                                                                                                                                                                                                                                                                                                                                                                                                                                                                                                                                                                                                                                                                                                                                                                                                                                                                                                                                                                                                                                                                                                                                                         |                                      |
| <b>Age:</b> at cohort entry, categorized as 16–24, 25–34, 35–44, 45–54, 55–64, ≥65                                                                                                                                                                                                                                                                                                                                                                                                                                                                                                                                                                                                                                                                                                                                                                                                                                                                                                                                                                                                                                                                                                                                                                                                   | TC                                   |
| <b>Gender</b>                                                                                                                                                                                                                                                                                                                                                                                                                                                                                                                                                                                                                                                                                                                                                                                                                                                                                                                                                                                                                                                                                                                                                                                                                                                                        | TC                                   |
| <b>Year of cohort entry:</b> categorized as: 1999 or earlier, 2000–2004, 2005–2009, 2010 or later.                                                                                                                                                                                                                                                                                                                                                                                                                                                                                                                                                                                                                                                                                                                                                                                                                                                                                                                                                                                                                                                                                                                                                                                   | TC                                   |
| <b>Time since diagnosis at cohort entry:</b> categorized as 0–1, 1–3, >3 years                                                                                                                                                                                                                                                                                                                                                                                                                                                                                                                                                                                                                                                                                                                                                                                                                                                                                                                                                                                                                                                                                                                                                                                                       | TC                                   |
| <b>Number of previous psychiatric inpatient visits:</b> continuously updated in the models, categorized as 0, 1, 2–4, 5–8, >8                                                                                                                                                                                                                                                                                                                                                                                                                                                                                                                                                                                                                                                                                                                                                                                                                                                                                                                                                                                                                                                                                                                                                        | TC                                   |
| <b>Non-adherence:</b> defined at the cohort entry;<br>For prevalent patients (excluding the incident cases): no on-going antipsychotic treatment within 4 months prior to the first inpatient hospitalization during the study period. For incident patients: no filled antipsychotic prescription within one month after the first schizophrenia (ICD–10 codes: F20 or F25) inpatient hospitalization during the study period.                                                                                                                                                                                                                                                                                                                                                                                                                                                                                                                                                                                                                                                                                                                                                                                                                                                      | TC                                   |
| <b>Exposure to other medications:</b> Continuously updated variables, each having status “never” until the first purchase of a specific drug occurred. After the first purchase, exposure was “current use” if prior purchases determined that exposure was still on-going and “past use” otherwise (prior purchases too far away in the past). Corresponding ATC codes:<br><ul style="list-style-type: none"> <li>- Analgesics: N02A, N02B, N02C, M01A</li> <li>- Anti-parkinson drugs/ anticholinergics: N04AA, N04AB, N04AC</li> <li>- Lipid-modifying agents: C10AA, AB, AC, AD, AX, C10BA01, C10BA02, C10BA03, C10BA06, C1BX01–05</li> <li>- Antidiabetic drugs: A10A, A10BA, BB, BC, BD, BF, BG, BH, BX, A10XA</li> <li>- Drugs used for addictive disorders: N07BB01, N07BB02, N07BB03, N07BB04, N07BB05, N07BC01, N07BC02, N07BC0, N07BC04, N07BC51</li> <li>- Substance abuse: a continuously updated variable with status “no” until the first substance abuse indication occurred and “yes” thereafter.</li> </ul> Corresponding ICD–10/ ATC codes: alcohol (F10.1 / N07BB01 – 05), cannabis (F12.1), psychoactive drugs (F19.1), antacids (F55), cocaine (F14.1), opioids (F11.1/ N07BC01 – 04, N07BC51), anxiolytics (F13.1), hallucinogenes (F16.1), solvents (F18.1). | TC                                   |

|                                                                                                                                                                                                                                                                       |    |
|-----------------------------------------------------------------------------------------------------------------------------------------------------------------------------------------------------------------------------------------------------------------------|----|
| <b>Comorbidities:</b> continuously updated variables for each of the individual comorbidities presented below, categorized as “ever” vs. “never”.<br>- Cardiovascular disease: I00-I99<br>- Liver disease: K70-K77<br>- Diabetes: E10-E14<br>- Renal disease: N10-N19 | TC |
| <b>Prior suicide attempt:</b> continuously updated variable, defined as X60–X84, Z91.5                                                                                                                                                                                | TC |
| <b>Prior use of LAI:</b> continuously updated variable, “yes” vs. “no”                                                                                                                                                                                                | TC |
| WI= within-individual Cox model, TC= traditional Cox model, LAI = long-acting injection.<br>Comorbidities according to ICD–10 codes (International Classification of Diseases), medications according to ATC (Anatomical Therapeutic Chemical classification) codes.  |    |

**eTable 2.** Median Doses of Antipsychotics in Defined Daily Doses (DDDs) and Milligrams (mg), With Interquartile Ranges (IQRs). (All exposure periods included).

|                                      | Prevalent cohort    |                           |                          | Incident cohort     |                           |                          |
|--------------------------------------|---------------------|---------------------------|--------------------------|---------------------|---------------------------|--------------------------|
|                                      | Median dose in DDDs | Median dose in milligrams | IQR for median dose (mg) | Median dose in DDDs | Median dose in milligrams | IQR for median dose (mg) |
| <b>Oral antipsychotics</b>           |                     |                           |                          |                     |                           |                          |
| aripiprazole                         | 1.00                | 15.0                      | 14.3–23.0                | 1.00                | 15.0                      | 14.0–22.5                |
| clozapine                            | 1.13                | 337.9                     | 234.8–471.1              | 1.00                | 300.9                     | 204.0–418.6              |
| olanzapine                           | 1.40                | 14.0                      | 9.1–20.0                 | 1.30                | 13.0                      | 8.7–19.7                 |
| quetiapine                           | 0.64                | 254.5                     | 96.1–508.5               | 0.55                | 218.3                     | 75.7–473.2               |
| risperidone                          | 0.56                | 2.8                       | 1.7–4.3                  | 0.50                | 2.5                       | 1.6–4.0                  |
| <b>Long-acting injections (LAIs)</b> |                     |                           |                          |                     |                           |                          |
| aripiprazole LAI                     | 1.06                | 14.1                      | 13.0–14.3                | 1.06                | 14.1                      | 13.1–14.3                |
| flupentixol LAI                      | 0.76                | 3.1                       | 1.5–5.6                  | 0.60                | 2.4                       | 1.3–5.2                  |
| fluphenazine LAI                     | 1.52                | 1.5                       | 1.1–2.9                  | 1.63                | 1.63                      | 1.2–3.2                  |
| haloperidol LAI                      | 1.29                | 4.3                       | 3.1–7.1                  | 1.00                | 3.4                       | 2.1–4.8                  |
| olanzapine LAI                       | 1.76                | 17.6                      | 13.8–21.1                | 1.80                | 18.0                      | 13.7–21.2                |
| paliperidone LAI                     | 1.33                | 3.3                       | 2.6–4.4                  | 1.29                | 3.2                       | 2.5–4.0                  |
| perphenazine LAI                     | 1.01                | 7.1                       | 4.9–8.9                  | 1.00                | 7.1                       | 4.5–9.8                  |
| pipotiazine LAI                      | 1.19                | 6.0                       | 3.7–7.1                  |                     |                           |                          |
| risperidone LAI                      | 1.00                | 2.7                       | 2.1–3.5                  | 0.98                | 2.6                       | 1.9–3.4                  |
| zuclophenthixol LAI                  | 1.02                | 15.3                      | 12.4–27.2                | 0.96                | 14.4                      | 12.1–19.9                |

**eTable 3.** Risk of Psychiatric Hospitalization During Specific Treatments Compared With No Antipsychotic Use in the Prevalent Cohort (Within-Individual Analysis). HR indicates Hazard Ratio with 95% confidence interval, IR incidence rate per 10 person-years. “LAI” refers to any long-acting injectable antipsychotic [LAI] (only one LAI in use), “mono” to monotherapy. “Other comp” indicates other combinations of multiple antipsychotics (two LAIs, more than two antipsychotics). “Other oral” indicates other oral antipsychotics (first generation antipsychotics, ziprasidone, asenapine). arip: aripiprazole, clozap: clozapine, olanza: olanzapine, risper: risperidone, queti: quetiapine. Combination of two antipsychotics denoted with “—”.

| <b>Drug</b>        | <b>HR (95% CI)</b> | <b>p-value</b> | <b>events</b> | <b>Person-years</b> | <b>IR (95% CI)</b> |
|--------------------|--------------------|----------------|---------------|---------------------|--------------------|
| no use             | reference          | reference      | 32635         | 188308              | 1.73 (1.71–1.75)   |
| aripi—clozap       | 0.42 (0.39–0.46)   | <0.0001        | 2214          | 7232                | 3.06 (2.94–3.19)   |
| olanza—LAI         | 0.48 (0.44–0.51)   | <0.0001        | 2867          | 7103                | 4.04 (3.89–4.19)   |
| clozap mono        | 0.49 (0.47–0.51)   | <0.0001        | 24319         | 75557               | 3.22 (3.18–3.26)   |
| olanza—clozap      | 0.49 (0.44–0.54)   | <0.0001        | 1370          | 3010                | 4.55 (4.32–4.80)   |
| clozap—LAI         | 0.50 (0.42–0.59)   | <0.0001        | 463           | 848                 | 5.46 (4.99–5.98)   |
| risper—clozap      | 0.50 (0.43–0.59)   | <0.0001        | 1082          | 2359                | 4.59 (4.32–4.87)   |
| clozap—queti       | 0.52 (0.48–0.57)   | <0.0001        | 1912          | 4151                | 4.61 (4.40–4.82)   |
| clozap— other oral | 0.53 (0.50–0.56)   | <0.0001        | 9489          | 16167               | 5.87 (5.75–5.99)   |
| other oral—LAI     | 0.55 (0.53–0.58)   | <0.0001        | 11436         | 28815               | 3.97 (3.90–4.04)   |
| queti—LAI          | 0.55 (0.50–0.60)   | <0.0001        | 2295          | 4922                | 4.66 (4.48–4.86)   |
| LAI mono           | 0.56 (0.54–0.58)   | <0.0001        | 13891         | 48976               | 2.84 (2.79–2.88)   |
| other comp         | 0.58 (0.56–0.60)   | <0.0001        | 29551         | 84201               | 3.51 (3.47–3.55)   |
| olanza—queti       | 0.61 (0.56–0.66)   | <0.0001        | 1696          | 5294                | 3.20 (3.05–3.36)   |
| olanza— other oral | 0.64 (0.61–0.67)   | <0.0001        | 8176          | 19549               | 4.18 (4.09–4.27)   |
| olanza mono        | 0.64 (0.61–0.66)   | <0.0001        | 16326         | 64021               | 2.55 (2.51–2.59)   |
| aripi—queti        | 0.65 (0.59–0.72)   | <0.0001        | 845           | 2635                | 3.21 (3.00–3.43)   |
| risper—olanza      | 0.65 (0.58–0.72)   | <0.0001        | 992           | 3076                | 3.23 (3.03–3.43)   |
| risper—queti       | 0.66 (0.60–0.73)   | <0.0001        | 1455          | 4583                | 3.17 (3.02–3.34)   |
| risper—LAI         | 0.67 (0.60–0.76)   | <0.0001        | 1174          | 2242                | 5.24 (4.94–5.54)   |
| queti— other oral  | 0.68 (0.63–0.74)   | <0.0001        | 3284          | 9107                | 3.61 (3.48–3.73)   |
| aripi—LAI          | 0.70 (0.59–0.83)   | <0.0001        | 276           | 456                 | 6.05 (5.38–6.81)   |
| olanza—aripi       | 0.70 (0.62–0.78)   | <0.0001        | 1000          | 2858                | 3.50 (3.29–3.72)   |
| other oral mono    | 0.71 (0.69–0.73)   | <0.0001        | 19467         | 101095              | 1.93 (1.90–1.95)   |
| risper— other oral | 0.72 (0.68–0.76)   | <0.0001        | 5970          | 15886               | 3.76 (3.66–3.85)   |
| aripi— other oral  | 0.73 (0.60–0.88)   | 0.00104        | 648           | 968                 | 6.69 (6.20–7.23)   |
| aripi mono         | 0.74 (0.65–0.84)   | <0.0001        | 1378          | 4576                | 3.01 (2.86–3.17)   |
| risper mono        | 0.75 (0.72–0.79)   | <0.0001        | 8528          | 35199               | 2.42 (2.37–2.47)   |
| risper—aripi       | 0.85 (0.62–1.16)   | 0.29930        | 96            | 382                 | 2.51 (2.06–3.07)   |
| queti mono         | 0.93 (0.88–0.97)   | 0.00283        | 7780          | 22975               | 3.39 (3.31–3.46)   |

**eTable 4.** The Effect Of Adding Any Other Antipsychotic On Top of Aripiprazole, Clozapine, Quetiapine, and Risperidone Monotherapy.

For example, adding another antipsychotic to aripiprazole results in about 12% lower risk of psychiatric rehospitalization (HR 0.88, 95%CI 0.72-1.06). “Effect” indicates hazard ratio, and Lo95CI and Hi95CI confidence intervals. Hospitalization outcomes were analyzed by using within-individual analysis, and mortality by using traditional Cox model. arip: aripiprazole, clozap: clozapine, olanza: olanzapine, risper: risperidone, queti: quetiapine.

| RESULT | OUTCOME                     | DRG    | Effect | Lo95CI | Hi95CI | Pvalue  |
|--------|-----------------------------|--------|--------|--------|--------|---------|
| 1      | Psychiatric hospitalization | aripi  | 0.877  | 0.723  | 1.064  | 0.18281 |
| 2      | Psychiatric hospitalization | clozap | 1.003  | 0.929  | 1.082  | 0.9473  |
| 3      | Psychiatric hospitalization | olanza | 0.922  | 0.811  | 1.047  | 0.21042 |
| 4      | Psychiatric hospitalization | queti  | 0.659  | 0.604  | 0.718  | <1e-05  |
| 5      | Psychiatric hospitalization | risper | 0.874  | 0.785  | 0.973  | 0.01383 |
| 6      | Any hospitalization         | aripi  | 0.823  | 0.698  | 0.972  | 0.02166 |
| 7      | Any hospitalization         | clozap | 1.014  | 0.948  | 1.085  | 0.6807  |
| 8      | Any hospitalization         | olanza | 0.896  | 0.805  | 0.998  | 0.04642 |
| 9      | Any hospitalization         | queti  | 0.758  | 0.687  | 0.836  | <1e-05  |
| 10     | Any hospitalization         | risper | 0.83   | 0.755  | 0.913  | 0.00013 |
| 11     | Death                       | aripi  | 0.601  | 0.421  | 0.858  | 0.00501 |
| 12     | Death                       | clozap | 0.797  | 0.637  | 0.998  | 0.04765 |
| 13     | Death                       | olanza | 0.81   | 0.743  | 0.882  | <1e-05  |
| 14     | Death                       | queti  | 0.687  | 0.549  | 0.859  | 0.00102 |
| 15     | Death                       | risper | 0.67   | 0.538  | 0.834  | 0.00035 |

**eTable 5.** Risk of Psychiatric Hospitalization During Specific Treatments Compared With No Antipsychotic Use In The Prevalent Cohort (Within-Individual Analysis). The first 90 days of all treatments are omitted to exclude switching periods. HR indicates Hazard Ratio, IR indicates incidence rate per 10 person-years. “LAI” refers to any long-acting injectable antipsychotic (only 1 used), “mono” to monotherapy, “other oral” indicates other oral antipsychotics (first generation antipsychotics, ziprasidone, asenapine), “other comp” indicates other combinations of multiple antipsychotics (two LAIs, more than two antipsychotics). arip: aripiprazole, clozap: clozapine, olanza: olanzapine, risper: risperidone, queti: quetiapine. Combination of two antipsychotics denoted with “—”.

| <b>Drug</b>       | <b>HR (95% CI)</b> | <b>p-value</b> | <b>events</b> | <b>Person-years</b> | <b>IR (95% CI)</b> |
|-------------------|--------------------|----------------|---------------|---------------------|--------------------|
| no use            | reference          | reference      | 59058         | 208221              | 2.84 (2.81–2.86)   |
| aripi—clozap      | 0.55 (0.51–0.61)   | <0.0001        | 2009          | 6748                | 2.98 (2.85–3.11)   |
| olanza—LAI        | 0.59 (0.55–0.63)   | <0.0001        | 2532          | 6623                | 3.82 (3.68–3.97)   |
| olanza—clozap     | 0.61 (0.55–0.67)   | <0.0001        | 1099          | 2742                | 4.01 (3.78–4.25)   |
| risper—clozap     | 0.64 (0.55–0.74)   | <0.0001        | 944           | 2205                | 4.28 (4.02–4.56)   |
| other comp        | 0.65 (0.63–0.67)   | <0.0001        | 22341         | 75838               | 2.95 (2.91–2.98)   |
| clozap—LAI        | 0.65 (0.54–0.79)   | <0.0001        | 385           | 781                 | 4.93 (4.46–5.45)   |
| olanza—queti      | 0.65 (0.60–0.71)   | <0.0001        | 1302          | 4644                | 2.80 (2.66–2.96)   |
| clozap—queti      | 0.67 (0.61–0.73)   | <0.0001        | 1627          | 3803                | 4.28 (4.08–4.49)   |
| queti—LAI         | 0.67 (0.61–0.74)   | <0.0001        | 1977          | 4478                | 4.42 (4.22–4.61)   |
| other oral—LAI    | 0.68 (0.65–0.70)   | <0.0001        | 10563         | 27355               | 3.86 (3.79–3.94)   |
| aripi—queti       | 0.68 (0.61–0.76)   | <0.0001        | 648           | 2326                | 2.79 (2.58–3.01)   |
| clozap—other oral | 0.68 (0.65–0.71)   | <0.0001        | 8519          | 15246               | 5.59 (5.47–5.71)   |
| clozap mono       | 0.68 (0.66–0.70)   | <0.0001        | 25012         | 75143               | 3.33 (3.29–3.37)   |
| risper—aripi      | 0.70 (0.49–0.98)   | 0.04060        | 55            | 314                 | 1.75 (1.34–2.28)   |
| risper—olanza     | 0.71 (0.63–0.80)   | <0.0001        | 758           | 2699                | 2.81 (2.62–3.02)   |
| LAI mono          | 0.72 (0.69–0.74)   | <0.0001        | 15228         | 49022               | 3.11 (3.06–3.16)   |
| olanza—other oral | 0.73 (0.70–0.77)   | <0.0001        | 6946          | 18012               | 3.86 (3.77–3.95)   |
| risper—queti      | 0.74 (0.67–0.83)   | <0.0001        | 1193          | 4113                | 2.90 (2.74–3.07)   |
| risper—LAI        | 0.75 (0.66–0.86)   | <0.0001        | 849           | 1886                | 4.50 (4.21–4.82)   |
| queti—other oral  | 0.77 (0.71–0.83)   | <0.0001        | 2687          | 8179                | 3.29 (3.16–3.41)   |
| olanza mono       | 0.80 (0.77–0.83)   | <0.0001        | 17052         | 63313               | 2.69 (2.65–2.73)   |
| olanza—aripi      | 0.81 (0.73–0.91)   | 0.00021        | 827           | 2527                | 3.27 (3.06–3.50)   |
| risper—other oral | 0.81 (0.77–0.86)   | <0.0001        | 4956          | 14494               | 3.42 (3.33–3.52)   |
| aripi—other oral  | 0.82 (0.69–0.98)   | 0.02814        | 550           | 846                 | 6.50 (5.98–7.07)   |
| aripi—LAI         | 0.83 (0.69–1.00)   | 0.04779        | 235           | 390                 | 6.03 (5.31–6.85)   |
| other oral mono   | 0.84 (0.82–0.86)   | <0.0001        | 23516         | 102812              | 2.29 (2.26–2.32)   |
| aripi mono        | 0.86 (0.78–0.94)   | 0.00111        | 1564          | 4573                | 3.42 (3.25–3.59)   |
| risper mono       | 0.89 (0.85–0.92)   | <0.0001        | 8683          | 34491               | 2.52 (2.47–2.57)   |
| queti mono        | 1.03 (0.99–1.08)   | 0.09518        | 8293          | 22724               | 3.65 (3.57–3.73)   |



**eTable 6.** Risk of All-Cause Hospitalization During Specific Treatments Compared With No Antipsychotic Use in the Prevalent Cohort (Within-Individual Analysis).

HR indicates Hazard Ratio, IR indicates incidence rate per 10 person-years. “LAI” refers to any long-acting injectable antipsychotic (when only 1 used at a time), “mono” to monotherapy, “other oral” indicates other oral antipsychotics (first generation antipsychotics, ziprasidone, asenapine), “other comp” indicates other combinations of multiple antipsychotics (two LAIs, more than two antipsychotics). arip: aripiprazole, clozap: clozapine, olanza: olanzapine, risper: risperidone, queti: quetiapine. Combination of two antipsychotics denoted with “—”.

| <b>Drug</b>       | <b>HR (95% CI)</b> | <b>p-value</b> | <b>events</b> | <b>Person-years</b> | <b>IR (95% CI)</b> |
|-------------------|--------------------|----------------|---------------|---------------------|--------------------|
| no use            | reference          | reference      | 91452         | 187415              | 4.88 (4.85–4.91)   |
| aripi—clozap      | 0.50 (0.47–0.54)   | <0.0001        | 3498          | 7216                | 4.85 (4.69–5.01)   |
| clozap mono       | 0.57 (0.55–0.59)   | <0.0001        | 38322         | 75356               | 5.09 (5.03–5.14)   |
| olanza—LAI        | 0.57 (0.54–0.60)   | <0.0001        | 4604          | 7077                | 6.51 (6.32–6.70)   |
| clozap—LAI        | 0.59 (0.50–0.68)   | <0.0001        | 646           | 845                 | 7.65 (7.08–8.26)   |
| risper—clozap     | 0.59 (0.53–0.67)   | <0.0001        | 1631          | 2351                | 6.94 (6.61–7.28)   |
| clozap—queti      | 0.60 (0.56–0.65)   | <0.0001        | 2922          | 4138                | 7.06 (6.81–7.32)   |
| olanza—clozap     | 0.60 (0.55–0.65)   | <0.0001        | 2178          | 2998                | 7.26 (6.97–7.58)   |
| clozap—other oral | 0.61 (0.58–0.64)   | <0.0001        | 14043         | 16102               | 8.72 (8.58–8.87)   |
| other oral—LAI    | 0.62 (0.59–0.64)   | <0.0001        | 19642         | 28688               | 6.85 (6.75–6.94)   |
| other comp        | 0.65 (0.63–0.66)   | <0.0001        | 56486         | 83785               | 6.74 (6.69–6.80)   |
| LAI mono          | 0.67 (0.65–0.69)   | <0.0001        | 26602         | 48777               | 5.45 (5.39–5.52)   |
| queti—LAI         | 0.67 (0.62–0.71)   | <0.0001        | 3887          | 4899                | 7.93 (7.69–8.19)   |
| olanza—other oral | 0.73 (0.70–0.76)   | <0.0001        | 13838         | 19460               | 7.11 (6.99–7.23)   |
| risper—olanza     | 0.74 (0.68–0.81)   | <0.0001        | 1827          | 3063                | 5.96 (5.70–6.24)   |
| olanza—queti      | 0.76 (0.71–0.81)   | <0.0001        | 3558          | 5269                | 6.75 (6.53–6.98)   |
| risper—LAI        | 0.76 (0.70–0.83)   | <0.0001        | 1971          | 2230                | 8.84 (8.46–9.24)   |
| aripi—LAI         | 0.77 (0.66–0.89)   | 0.00047        | 384           | 455                 | 8.45 (7.64–9.34)   |
| olanza mono       | 0.77 (0.75–0.80)   | <0.0001        | 32840         | 63772               | 5.15 (5.09–5.21)   |
| other oral mono   | 0.79 (0.77–0.81)   | <0.0001        | 56133         | 100514              | 5.58 (5.54–5.63)   |
| olanza—aripi      | 0.79 (0.72–0.87)   | <0.0001        | 1660          | 2849                | 5.83 (5.55–6.11)   |
| aripi—other oral  | 0.80 (0.70–0.92)   | 0.00129        | 988           | 963                 | 10.26 (9.64–10.92) |
| aripi—queti       | 0.80 (0.73–0.87)   | <0.0001        | 1645          | 2624                | 6.27 (5.97–6.58)   |
| queti—other oral  | 0.80 (0.76–0.84)   | <0.0001        | 7076          | 9052                | 7.82 (7.64–8.00)   |
| risper—other oral | 0.80 (0.77–0.84)   | <0.0001        | 10981         | 15807               | 6.95 (6.82–7.08)   |
| risper—queti      | 0.81 (0.76–0.87)   | <0.0001        | 3089          | 4559                | 6.78 (6.54–7.02)   |
| risper—aripi      | 0.87 (0.71–1.07)   | 0.18491        | 191           | 380                 | 5.02 (4.36–5.79)   |
| aripi mono        | 0.90 (0.83–0.97)   | 0.00881        | 2682          | 4557                | 5.89 (5.67–6.11)   |
| risper mono       | 0.91 (0.88–0.94)   | <0.0001        | 20751         | 35000               | 5.93 (5.85–6.01)   |
| queti mono        | 0.97 (0.94–1.00)   | 0.08048        | 17594         | 22822               | 7.71 (7.60–7.82)   |

**eTable 7.** Risk of Psychiatric Hospitalization During Specific Treatments Compared With No Antipsychotic Use In The Incident Cohort (Within-Individual Analysis).

HR indicates Hazard Ratio, IR indicates incidence rate per 10 person-years. “LAI” refers to any long-acting injectable antipsychotic (when only 1 used at a time), “mono” to monotherapy, “other oral” indicates other oral antipsychotics (first generation antipsychotics, ziprasidone, asenapine), “other comp” indicates other combinations of multiple antipsychotics (two LAIs, more than two antipsychotics). arip: aripiprazole, clozap: clozapine, olanza: olanzapine, risper: risperidone, queti: quetiapine. Combination of two antipsychotics denoted with “—”.

| Drug              | HR (95% CI)      | p-value   | events | Person-years | IR (95% CI)      |
|-------------------|------------------|-----------|--------|--------------|------------------|
| no use            | reference        | reference | 6592   | 25717        | 2.56 (2.50–2.63) |
| aripi–clozap      | 0.34 (0.28–0.42) | <0.0001   | 410    | 1777         | 2.31 (2.09–2.54) |
| clozap mono       | 0.44 (0.39–0.49) | <0.0001   | 2592   | 9489         | 2.73 (2.63–2.84) |
| olanza–queti      | 0.44 (0.35–0.55) | <0.0001   | 189    | 758          | 2.49 (2.16–2.87) |
| LAI mono          | 0.45 (0.40–0.51) | <0.0001   | 1127   | 4661         | 2.42 (2.28–2.56) |
| olanza–LAI        | 0.45 (0.37–0.54) | <0.0001   | 256    | 600          | 4.27 (3.77–4.82) |
| clozap–LAI        | 0.48 (0.22–1.04) | 0.06308   | 60     | 146          | 4.10 (3.18–5.28) |
| other oral–LAI    | 0.49 (0.39–0.62) | <0.0001   | 246    | 621          | 3.96 (3.50–4.49) |
| olanza–clozap     | 0.50 (0.39–0.64) | <0.0001   | 142    | 300          | 4.73 (4.01–5.58) |
| queti–LAI         | 0.50 (0.37–0.67) | <0.0001   | 241    | 568          | 4.24 (3.74–4.81) |
| risper–olanza     | 0.51 (0.39–0.66) | <0.0001   | 133    | 368          | 3.61 (3.05–4.28) |
| other comp        | 0.54 (0.48–0.62) | <0.0001   | 1193   | 2100         | 5.68 (5.37–6.01) |
| olanza–other oral | 0.55 (0.46–0.65) | <0.0001   | 411    | 1067         | 3.85 (3.50–4.24) |
| clozap–other oral | 0.56 (0.46–0.68) | <0.0001   | 601    | 894          | 6.73 (6.21–7.29) |
| clozap–queti      | 0.56 (0.46–0.69) | <0.0001   | 331    | 612          | 5.41 (4.86–6.03) |
| risper–LAI        | 0.56 (0.38–0.83) | 0.00427   | 51     | 116          | 4.40 (3.34–5.79) |
| olanza mono       | 0.58 (0.53–0.64) | <0.0001   | 2626   | 11565        | 2.27 (2.19–2.36) |
| aripi–LAI         | 0.59 (0.43–0.80) | 0.00087   | 61     | 113          | 5.40 (4.20–6.94) |
| risper–aripi      | 0.60 (0.30–1.19) | 0.14394   | 14     | 96           | 1.46 (0.87–2.47) |
| risper mono       | 0.60 (0.52–0.68) | <0.0001   | 1052   | 5548         | 1.90 (1.79–2.01) |
| risper–other oral | 0.62 (0.52–0.76) | <0.0001   | 310    | 688          | 4.51 (4.03–5.04) |
| risper–clozap     | 0.65 (0.33–1.28) | 0.21303   | 102    | 153          | 6.66 (5.49–8.09) |
| queti–other oral  | 0.67 (0.57–0.79) | <0.0001   | 356    | 773          | 4.61 (4.15–5.11) |
| aripi–queti       | 0.68 (0.53–0.88) | 0.00330   | 174    | 651          | 2.67 (2.30–3.10) |
| other oral mono   | 0.70 (0.63–0.78) | <0.0001   | 1127   | 4216         | 2.67 (2.52–2.83) |
| olanza–aripi      | 0.70 (0.55–0.91) | 0.00737   | 211    | 684          | 3.08 (2.70–3.53) |
| aripi mono        | 0.75 (0.50–1.12) | 0.16285   | 353    | 1510         | 2.34 (2.11–2.60) |
| queti mono        | 0.76 (0.67–0.86) | <0.0001   | 1218   | 4298         | 2.83 (2.68–3.00) |
| risper–queti      | 0.80 (0.56–1.14) | 0.22146   | 170    | 590          | 2.88 (2.48–3.35) |
| aripi–other oral  | 1.04 (0.75–1.45) | 0.80920   | 72     | 135          | 5.33 (4.23–6.72) |

**eTable 8.** Risk of Somatic Hospitalization During Specific Treatments Compared With No Antipsychotic Use (Within-Individual Analysis).

HR indicates Hazard Ratio, IR incidence rate per 10 person-years. “LAI” refers to any long-acting injectable antipsychotic (when only 1 used at a time), “mono” to monotherapy, “other oral” indicates other oral antipsychotics (first generation antipsychotics, ziprasidone, asenapine), “other comp” indicates other combinations of multiple antipsychotics (two LAIs, more than two antipsychotics). arip: aripiprazole, clozap: clozapine, olanza: olanzapine, risper: risperidone, queti: quetiapine. Combination of two antipsychotics denoted with “—”.

| <b>Drug</b>       | <b>HR (95% CI)</b> | <b>p-value</b> | <b>events</b> | <b>Person-years</b> | <b>IR (95% CI)</b> |
|-------------------|--------------------|----------------|---------------|---------------------|--------------------|
| no use            | reference          | reference      | 49717         | 188107              | 2.64 (2.62–2.67)   |
| other oral–LAI    | 0.79 (0.75–0.84)   | <0.0001        | 7615          | 28912               | 2.63 (2.58–2.69)   |
| other comp        | 0.82 (0.79–0.85)   | <0.0001        | 24360         | 84390               | 2.89 (2.85–2.92)   |
| LAI mono          | 0.92 (0.88–0.97)   | 0.00127        | 11824         | 49047               | 2.41 (2.37–2.45)   |
| risper–other oral | 0.92 (0.87–0.98)   | 0.00962        | 4385          | 15935               | 2.75 (2.67–2.83)   |
| olanza–LAI        | 0.93 (0.85–1.01)   | 0.09244        | 1656          | 7134                | 2.32 (2.21–2.44)   |
| other oral mono   | 0.94 (0.91–0.97)   | 0.00017        | 31883         | 100984              | 3.16 (3.12–3.19)   |
| clozap–other oral | 0.95 (0.89–1.02)   | 0.17421        | 4309          | 16273               | 2.65 (2.57–2.73)   |
| olanza–other oral | 0.95 (0.90–1.01)   | 0.10180        | 5083          | 19629               | 2.59 (2.52–2.66)   |
| risper–LAI        | 0.97 (0.86–1.09)   | 0.58966        | 767           | 2253                | 3.40 (3.17–3.65)   |
| risper–olanza     | 0.98 (0.86–1.12)   | 0.77643        | 786           | 3082                | 2.55 (2.38–2.74)   |
| queti–other oral  | 0.99 (0.93–1.06)   | 0.78163        | 3092          | 9127                | 3.39 (3.27–3.51)   |
| aripi–LAI         | 1.00 (0.76–1.33)   | 0.97282        | 100           | 460                 | 2.17 (1.79–2.64)   |
| queti–LAI         | 1.02 (0.93–1.12)   | 0.65384        | 1370          | 4942                | 2.77 (2.63–2.92)   |
| clozap mono       | 1.04 (0.99–1.10)   | 0.12022        | 13705         | 75793               | 1.81 (1.78–1.84)   |
| aripi–other oral  | 1.05 (0.88–1.25)   | 0.61762        | 293           | 977                 | 3.00 (2.68–3.36)   |
| aripi–clozap      | 1.06 (0.95–1.19)   | 0.28035        | 1283          | 7259                | 1.77 (1.67–1.87)   |
| olanza mono       | 1.09 (1.04–1.14)   | 0.00019        | 14400         | 64113               | 2.25 (2.21–2.28)   |
| queti mono        | 1.09 (1.04–1.15)   | 0.00055        | 7702          | 23004               | 3.35 (3.27–3.42)   |
| olanza queti      | 1.10 (1.00–1.21)   | 0.06209        | 1477          | 5308                | 2.78 (2.64–2.93)   |
| risper mono       | 1.11 (1.06–1.17)   | <0.0001        | 10836         | 35191               | 3.08 (3.02–3.14)   |
| risper–queti      | 1.11 (1.01–1.22)   | 0.02372        | 1435          | 4591                | 3.13 (2.97–3.29)   |
| clozap–queti      | 1.12 (0.99–1.26)   | 0.06898        | 955           | 4177                | 2.29 (2.15–2.44)   |
| olanza–clozap     | 1.12 (0.98–1.29)   | 0.10387        | 819           | 3023                | 2.71 (2.53–2.90)   |
| risper–clozap     | 1.12 (0.96–1.32)   | 0.15978        | 547           | 2369                | 2.31 (2.12–2.51)   |
| olanza–aripi      | 1.15 (0.98–1.34)   | 0.08460        | 556           | 2869                | 1.94(1.78–2.11)    |
| aripi–queti       | 1.17 (1.03–1.34)   | 0.02005        | 645           | 2643                | 2.44 (2.26–2.64)   |
| clozap–LAI        | 1.17 (0.89–1.53)   | 0.26010        | 173           | 853                 | 2.03 (1.75–2.35)   |
| aripi mono        | 1.18 (1.04–1.33)   | 0.00889        | 1017          | 4587                | 2.22 (2.09–2.36)   |
| risper–aripi      | 1.26 (0.91–1.75)   | 0.16040        | 76            | 383                 | 1.99 (1.59–2.49)   |

**eTable 9.** Risk Of Death During Specific Antipsychotic Treatments Compared With No Use of Antipsychotic in the Total Cohort (Between-Individual Analysis). Hospital periods with over 7 days duration were censored. HR indicates Hazard Ratio, IR incidence rate per 10,000 person-years. “LAI” refers to any long-acting injectable antipsychotic (when only 1 used at a time), “mono” to monotherapy, “other oral” indicates other oral antipsychotics (first generation antipsychotics, ziprasidone, asenapine), “other comp” indicates other combinations of multiple antipsychotics (two LAIs, more than two antipsychotics). aripri: aripiprazole, clozap: clozapine, olanza: olanzapine, risper: risperidone, queti: quetiapine. Combination of two antipsychotics denoted with “—”.

| <b>Drug</b>       | <b>HR (95% CI)</b> | <b>p-value</b> | <b>events</b> | <b>Person-years</b> | <b>IR (95% CI)</b> |
|-------------------|--------------------|----------------|---------------|---------------------|--------------------|
| no use            | reference          | reference      | 5635          | 187774              | 300 (292–308)      |
| aripi–queti       | 0.15 (0.08–0.28)   | <0.0001        | 10            | 2632                | 38 (21–71)         |
| clozap–queti      | 0.22 (0.15–0.34)   | <0.0001        | 22            | 4153                | 53 (35–81)         |
| aripi–LAI         | 0.23 (0.07–0.73)   | 0.01283        | 3             | 457                 | 66 (21–204)        |
| olanza–clozap     | 0.25 (0.17–0.39)   | <0.0001        | 22            | 3010                | 73 (48–111)        |
| aripi–clozap      | 0.27 (0.20–0.38)   | <0.0001        | 37            | 7236                | 51 (37–71)         |
| olanza–aripi      | 0.26 (0.16–0.41)   | <0.0001        | 19            | 2856                | 67 (42–104)        |
| risper–clozap     | 0.26 (0.16–0.42)   | <0.0001        | 18            | 2360                | 76 (48–121)        |
| risper–queti      | 0.27 (0.21–0.36)   | <0.0001        | 55            | 4574                | 120 (92–156)       |
| risper–aripi      | 0.29 (0.10–0.89)   | 0.03002        | 3             | 381                 | 79 (25–244)        |
| olanza–LAI        | 0.33 (0.26–0.41)   | <0.0001        | 89            | 7102                | 125 (102–154)      |
| olanza–other oral | 0.35 (0.31–0.40)   | <0.0001        | 247           | 19536               | 126 (112–143)      |
| queti–other oral  | 0.36 (0.30–0.43)   | <0.0001        | 129           | 9087                | 142 (120–169)      |
| clozap mono       | 0.39 (0.35–0.43)   | <0.0001        | 600           | 75576               | 79 (73–86)         |
| risper–olanza     | 0.41 (0.31–0.56)   | <0.0001        | 46            | 3072                | 150 (112–200)      |
| olanza mono       | 0.41 (0.38–0.45)   | <0.0001        | 808           | 63934               | 126 (118–135)      |
| olanza–queti      | 0.41 (0.32–0.52)   | <0.0001        | 76            | 5284                | 144 (115–180)      |
| other comp        | 0.42 (0.39–0.45)   | <0.0001        | 1288          | 84087               | 153 (145–162)      |
| clozap–other oral | 0.42 (0.36–0.49)   | <0.0001        | 176           | 16191               | 109 (94–126)       |
| aripi mono        | 0.43(0.31–0.58)    | <0.0001        | 42            | 4569                | 92 (68–124)        |
| other oral–LAI    | 0.44 (0.39–0.49)   | <0.0001        | 464           | 28796               | 161 (147–176)      |
| risper–other oral | 0.44 (0.38–0.50)   | <0.0001        | 251           | 15863               | 158 (140–179)      |
| queti–LAI         | 0.44 (0.36–0.56)   | <0.0001        | 87            | 4920                | 177 (143–218)      |
| queti mono        | 0.43 (0.39–0.49)   | <0.0001        | 385           | 22897               | 168 (152–186)      |
| clozap–LAI        | 0.48 (0.27–0.84)   | 0.01004        | 11            | 848                 | 130 (72–234)       |
| LAI mono          | 0.53 (0.49–0.58)   | <0.0001        | 865           | 48908               | 177 (166– 189)     |
| risper mono       | 0.51 (0.46–0.55)   | <0.0001        | 655           | 35101               | 187 (173–201)      |
| other oral mono   | 0.55 (0.51–0.58)   | <0.0001        | 1786          | 100778              | 177 (169–186)      |
| risper–LAI        | 0.52 (0.39–0.71)   | <0.0001        | 52            | 2240                | 232 (177– 305)     |
| aripi–other oral  | 0.62 (0.39–1.00)   | 0.05007        | 18            | 969                 | 186 (117–295)      |

**eTable 10.** Risk of Psychiatric Hospitalization During Specific Antipsychotic Treatments Compared With No Use of Antipsychotic in the Total Cohort (Between-Individual Analysis).

HR indicates Hazard Ratio, IR incidence rate per 10 person-years. “LAI” refers to any long-acting injectable antipsychotic (when only 1 used at a time), “mono” to monotherapy, “other oral” indicates other oral antipsychotics (first generation antipsychotics, ziprasidone, asenapine), “other comp” indicates other combinations of multiple antipsychotics (two LAIs, more than two antipsychotics). arip: aripiprazole, clozap: clozapine, olanza: olanzapine, risper: risperidone, queti: quetiapine. Combination of two antipsychotics denoted with “—”.

| <b>Drug</b>       | <b>HR (95% CI)</b> | <b>p-value</b> | <b>events</b> | <b>Person-years</b> | <b>IR (95% CI)</b> |
|-------------------|--------------------|----------------|---------------|---------------------|--------------------|
| no use            | reference          | reference      | 32635         | 188308              | 1.73 (1.71–1.75)   |
| olanza—LAI        | 0.57 (0.51–0.63)   | <0.0001        | 2867          | 7103                | 4.04 (3.89–4.19)   |
| clozap mono       | 0.60 (0.57–0.63)   | <0.0001        | 24319         | 75557               | 3.22 (3.18–3.26)   |
| aripi—clozap      | 0.61 (0.55–0.68)   | <0.0001        | 2214          | 7232                | 3.06 (2.94–3.19)   |
| olanza mono       | 0.62 (0.59–0.65)   | <0.0001        | 16326         | 64021               | 2.55 (2.51–2.59)   |
| olanza—clozap     | 0.65 (0.58–0.73)   | <0.0001        | 1370          | 3010                | 4.55 (4.32–4.80)   |
| LAI mono          | 0.66 (0.63–0.70)   | <0.0001        | 13891         | 48976               | 2.84 (2.79–2.88)   |
| olanza—queti      | 0.67 (0.61–0.75)   | <0.0001        | 1696          | 5294                | 3.20 (3.05–3.36)   |
| other oral—LAI    | 0.68 (0.64–0.72)   | <0.0001        | 11436         | 28815               | 3.97 (3.90–4.04)   |
| clozap—LAI        | 0.68 (0.53–0.87)   | 0.00221        | 463           | 848                 | 5.46 (4.99–5.98)   |
| olanza—other oral | 0.68 (0.63–0.73)   | <0.0001        | 8176          | 19549               | 4.18 (4.09–4.27)   |
| risper—clozap     | 0.68 (0.55–0.84)   | 0.00025        | 1082          | 2359                | 4.59 (4.32–4.87)   |
| risper—olanza     | 0.70 (0.60–0.81)   | <0.0001        | 992           | 3076                | 3.23 (3.03–3.43)   |
| clozap—queti      | 0.72 (0.64–0.81)   | <0.0001        | 1912          | 4152                | 4.61 (4.40–4.82)   |
| risper mono       | 0.74 (0.69–0.78)   | <0.0001        | 8528          | 35199               | 2.42 (2.37–2.47)   |
| other oral mono   | 0.76 (0.73–0.79)   | <0.0001        | 19467         | 101095              | 1.93 (1.90–1.95)   |
| other comp        | 0.76 (0.73–0.80)   | <0.0001        | 29551         | 84201               | 3.51 (3.47–3.55)   |
| aripi—queti       | 0.76 (0.68–0.86)   | <0.0001        | 845           | 2635                | 3.21 (3.00–3.43)   |
| clozap—other oral | 0.76 (0.70–0.82)   | <0.0001        | 9489          | 16167               | 5.87 (5.75–5.99)   |
| risper—aripi      | 0.76 (0.60–0.98)   | 0.03408        | 96            | 382                 | 2.51 (2.06–3.07)   |
| risper—other oral | 0.78 (0.73–0.84)   | <0.0001        | 5970          | 15886               | 3.76 (3.66–3.85)   |
| risper—queti      | 0.80 (0.70–0.92)   | 0.00150        | 1455          | 4583                | 3.17 (3.02–3.34)   |
| queti—LAI         | 0.83 (0.74–0.93)   | 0.00178        | 2295          | 4922                | 4.66 (4.48–4.86)   |
| aripi mono        | 0.84 (0.74–0.95)   | 0.00663        | 1378          | 4576                | 3.01 (2.86–3.17)   |
| risper—LAI        | 0.85 (0.75–0.96)   | 0.01000        | 1174          | 2242                | 5.24 (4.94–5.54)   |
| olanza—aripi      | 0.88 (0.76–1.01)   | 0.07596        | 1000          | 2858                | 3.50 (3.29–3.70)   |
| queti—other oral  | 0.89 (0.82–0.96)   | 0.00460        | 3284          | 9107                | 3.61 (3.48–3.73)   |
| aripi—LAI         | 0.98 (0.78–1.23)   | 0.83226        | 276           | 456                 | 6.05 (5.38–6.81)   |
| queti mono        | 0.99 (0.93–1.05)   | 0.71385        | 7780          | 22975               | 3.39 (3.31–3.46)   |
| aripi—other oral  | 1.32 (1.06–1.65)   | 0.01377        | 648           | 968                 | 6.69 (6.20–7.23)   |

**eTable 11.** Risk of Psychiatric Re-Hospitalization During Specific Treatments Compared With No Antipsychotic Treatment in the Incident Cohort (Between-Individual Analyses).

HR indicates Hazard Ratio, IR incidence rate per 10 person-years. “LAI” refers to any long-acting injectable antipsychotic (when only 1 used at a time), “mono” to monotherapy, “other oral” indicates other oral antipsychotics (first generation antipsychotics, ziprasidone, asenapine), “other comp” indicates other combinations of multiple antipsychotics (two LAIs, more than two antipsychotics). arip: aripiprazole, clozap: clozapine, olanza: olanzapine, risper: risperidone, queti: quetiapine. Combination of two antipsychotics denoted with “—”.

| Drug              | HR (95% CI)      | p-value   | events | Person-years | IR (95% CI)      |
|-------------------|------------------|-----------|--------|--------------|------------------|
| no use            | reference        | reference | 6592   | 25717        | 2.56 (2.50–2.63) |
| LAI mono          | 0.53 (0.45–0.61) | <0.0001   | 1127   | 4661         | 2.42 (2.28–2.56) |
| aripi–clozap      | 0.53 (0.42–0.66) | <0.0001   | 410    | 1777         | 2.31 (2.09–2.54) |
| other oral–LAI    | 0.59 (0.46–0.76) | <0.0001   | 246    | 621          | 3.96 (3.50–4.49) |
| clozap mono       | 0.59 (0.52–0.68) | <0.0001   | 2592   | 9489         | 2.73 (2.63–2.84) |
| olanza–LAI        | 0.59 (0.47–0.74) | <0.0001   | 256    | 600          | 4.27 (3.77–4.82) |
| olanza–queti      | 0.59 (0.45–0.77) | <0.0001   | 189    | 758          | 2.49 (2.16–2.87) |
| risper–aripi      | 0.59 (0.32–1.07) | 0.08114   | 14     | 96           | 1.46 (0.87–2.47) |
| risper mono       | 0.63 (0.56–0.70) | <0.0001   | 1052   | 5548         | 1.90 (1.79–2.01) |
| olanza mono       | 0.66 (0.59–0.74) | <0.0001   | 2626   | 11565        | 2.27 (2.19–2.36) |
| risper–olanza     | 0.66 (0.47–0.94) | 0.01922   | 133    | 368          | 3.61 (3.05–4.28) |
| olanza–other oral | 0.70 (0.59–0.83) | <0.0001   | 411    | 1067         | 3.85 (3.50–4.24) |
| queti–LAI         | 0.69 (0.47–1.02) | 0.06045   | 241    | 568          | 4.24 (3.74–4.81) |
| clozap–LAI        | 0.75 (0.40–1.41) | 0.36887   | 60     | 146          | 4.10 (3.18–5.28) |
| aripi mono        | 0.78 (0.59–1.02) | 0.07323   | 353    | 1510         | 2.34 (2.11–2.60) |
| risper–LAI        | 0.80 (0.56–1.15) | 0.23610   | 51     | 116          | 4.40 (3.34–5.79) |
| other oral mono   | 0.81 (0.72–0.91) | 0.00035   | 1127   | 4216         | 2.67 (2.52–2.83) |
| olanza–clozap     | 0.81 (0.58–1.13) | 0.21583   | 142    | 300          | 4.73 (4.01–5.58) |
| aripi–queti       | 0.84 (0.64–1.09) | 0.18882   | 174    | 651          | 2.67 (2.30–3.10) |
| queti mono        | 0.87 (0.76–0.98) | 0.02784   | 1218   | 4298         | 2.83 (2.68–3.00) |
| other comp        | 0.91 (0.78–1.06) | 0.21512   | 1193   | 2100         | 5.68 (5.37–6.01) |
| clozap–queti      | 0.91 (0.72–1.16) | 0.46204   | 331    | 612          | 5.41 (4.86–6.03) |
| aripi–LAI         | 0.92 (0.59–1.44) | 0.72390   | 61     | 113          | 5.40 (4.20–6.94) |
| risper–other oral | 0.93 (0.63–1.36) | 0.69604   | 310    | 687          | 4.51 (4.03–5.04) |
| olanza–aripi      | 0.96 (0.64–1.44) | 0.83466   | 211    | 684          | 3.08 (2.70–3.53) |
| risper–queti      | 0.96 (0.67–1.37) | 0.82945   | 170    | 590          | 2.88 (2.48–3.35) |
| clozap–other oral | 1.05 (0.84–1.31) | 0.69427   | 601    | 894          | 6.73 (6.21–7.29) |
| queti–other oral  | 1.05 (0.82–1.34) | 0.69244   | 356    | 773          | 4.61 (4.15–5.11) |
| risper–clozap     | 1.17 (0.58–2.38) | 0.66015   | 102    | 153          | 6.66 (5.49–8.09) |
| aripi–other oral  | 1.23 (0.86–1.78) | 0.26079   | 72     | 135          | 5.33 (4.23–6.72) |

**Figure 1.** Restructuring of Data for Within Individual Analyses (with time resetting after each outcome event).

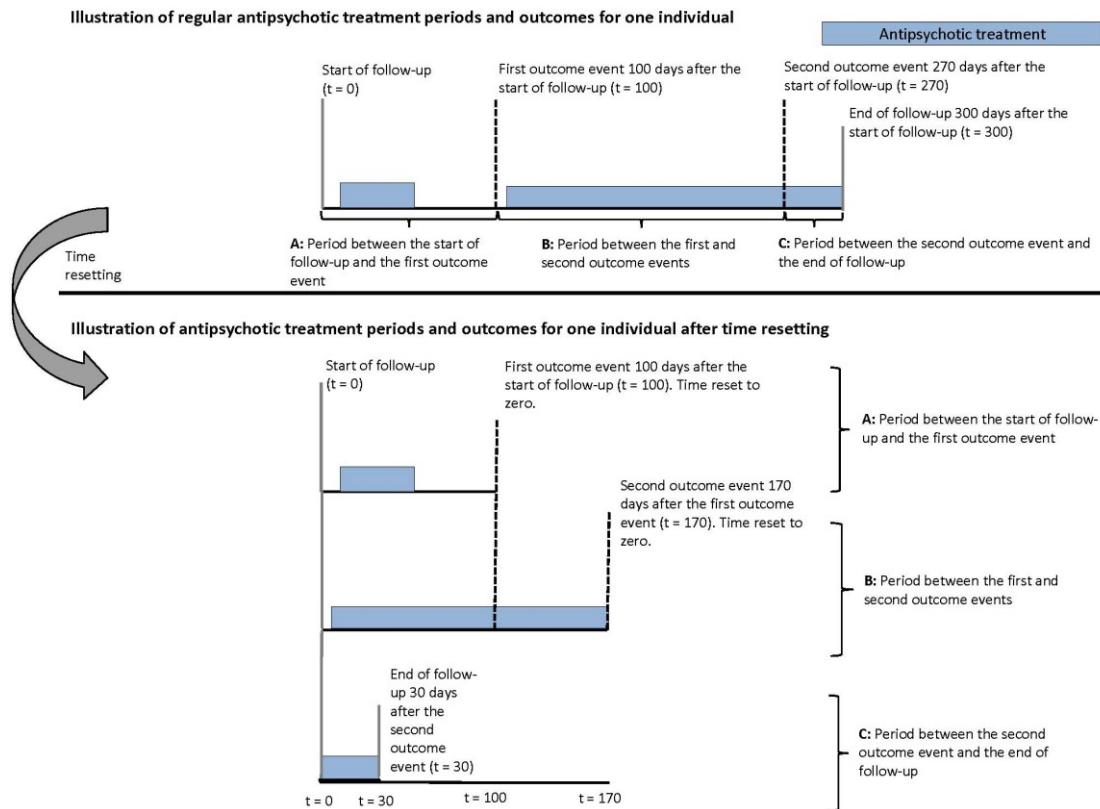

**Illustration of data-analysis after time resetting by using each individual as his/her own control (continued)**

In the within-individual analyses stratified Cox model is used. Each individual forms his/her own stratum. Within each stratum, time periods from the same individual resulting after time resetting are used in comparisons as different individuals are compared in a traditional Cox model. The figure below illustrates how the likelihood contribution of one individual is calculated in the within-individual model. The full likelihood is a product over all individual contributions. The method is also illustrated in Supplement to: Lichtenstein P, Halldner L, Zetterqvist J, et al. Medication for attention deficit-hyperactivity disorder and criminality. *N Engl J Med* 2012;367:2006-14. DOI: 10.1056/NEJMoa1203241.

In this illustration it is assumed that at any given time  $t$  an individual may have either of two possible statuses (0 or 1), denoted  $X(t)$ . The status is  $X(t) = 0$  when the individual is not treated with any antipsychotic and  $X(t) = 1$  when treated. The individual is also assumed to have his/her own baseline hazard that is proportional to  $\exp(X(t) \cdot b)$ . In general, at the time of an event, the risk set consists of all ongoing sub-periods, i.e., of those that (after time resetting) began before the event and ended after it. The illustrated individual has two events from which his/her likelihood contribution arises. At the time of the first event ( $t = 100$ ), the risk set consists also of (sub)period B. At the time of the second event ( $t = 170$ ) there are no other ongoing sub-periods. Individual contributions of each of the two events are given in the figure and yield a total contribution of  $[1/(1 + \exp(b))] \times 1$ .

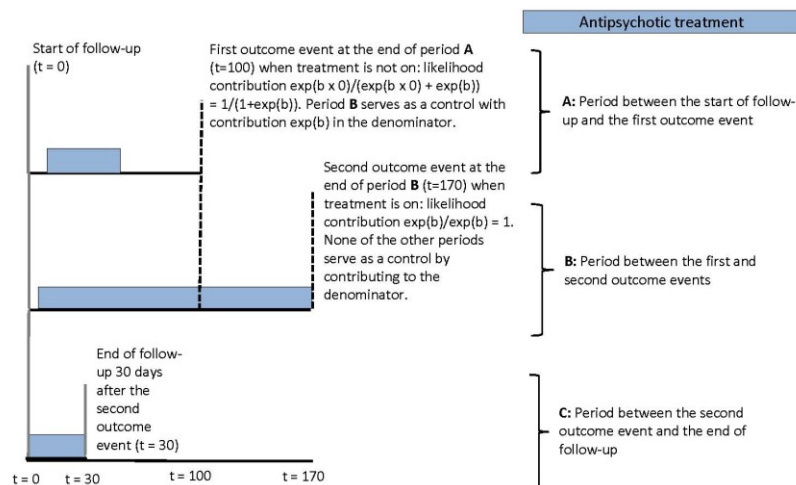

**eFigure 2.** Risk of Psychiatric Hospitalization During Specific Treatments Compared With No Antipsychotic Use in the Prevalent Cohort (Within-Individual Analysis). The first 90 days of all treatments are omitted to exclude switching periods. LAI indicates long-acting injection. Monotherapies are highlighted in red.

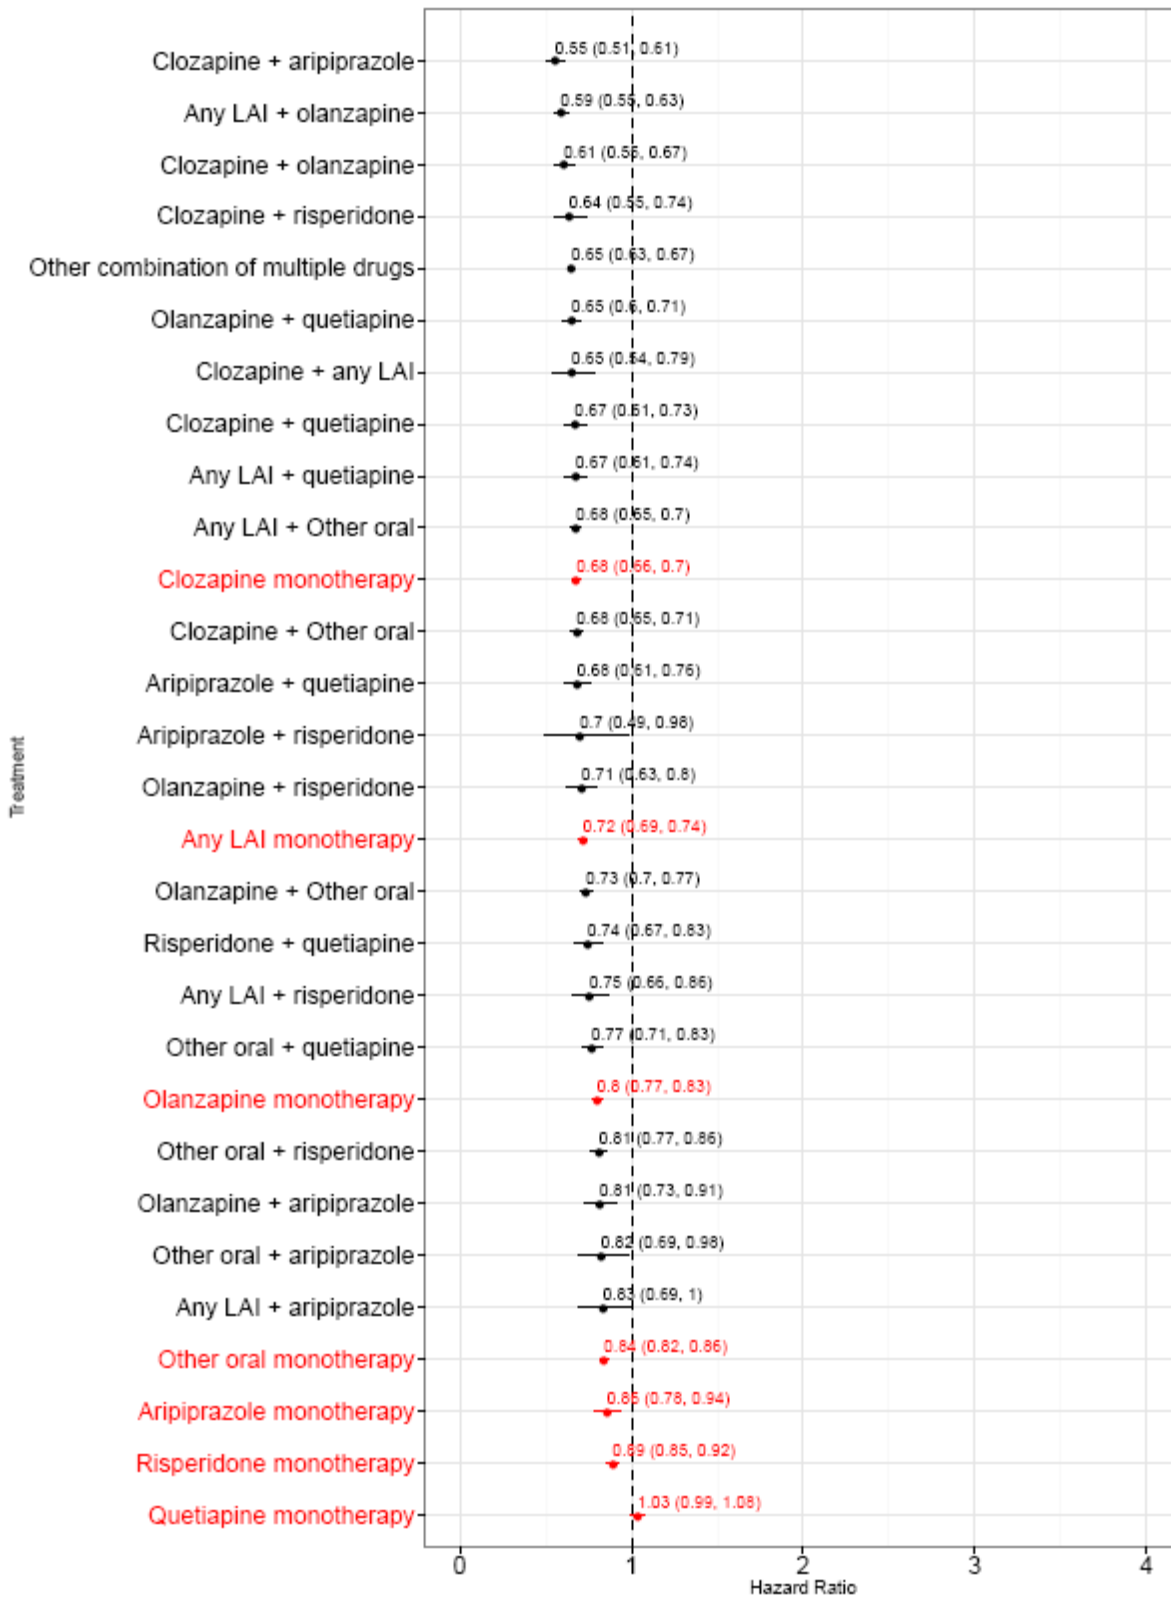



**eFigure 3.** Risk of All-Cause Hospitalization During Specific Treatments Compared With No Antipsychotic Use in the Prevalent Cohort (Within-Individual Analysis). LAI indicates long-acting injection. Monotherapies are highlighted in red.

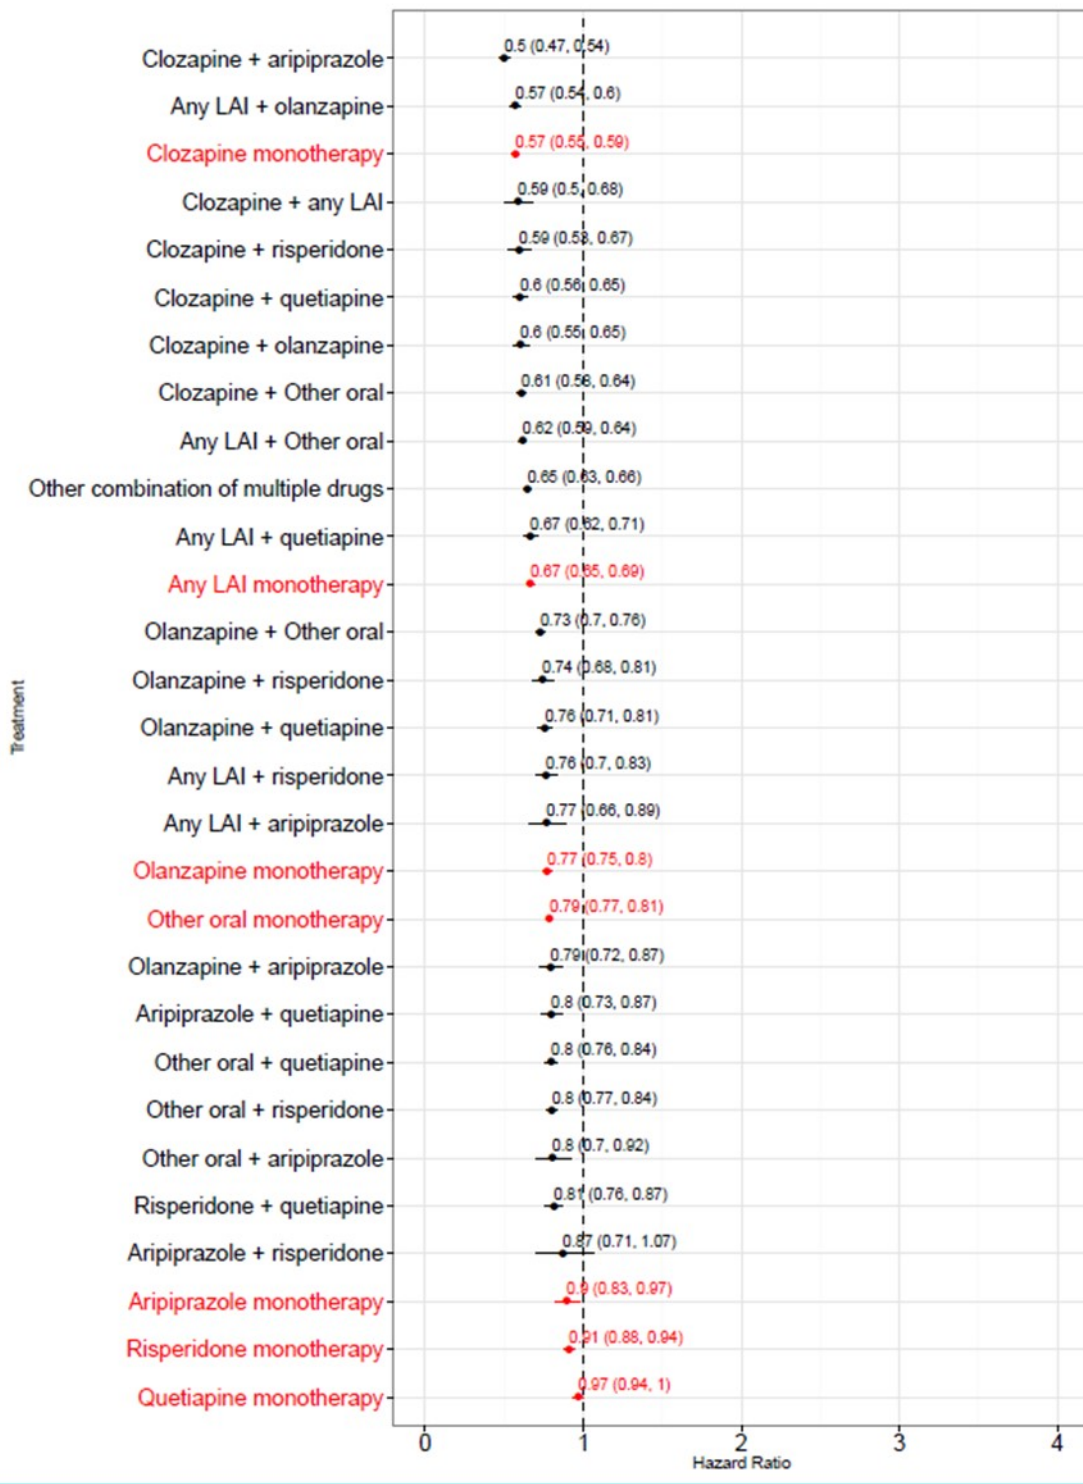

**eFigure 4.** Risk of Somatic Hospitalization During Specific Treatments Compared With No Antipsychotic Use (Within-Individual Analysis). Monotherapies are highlighted in red.

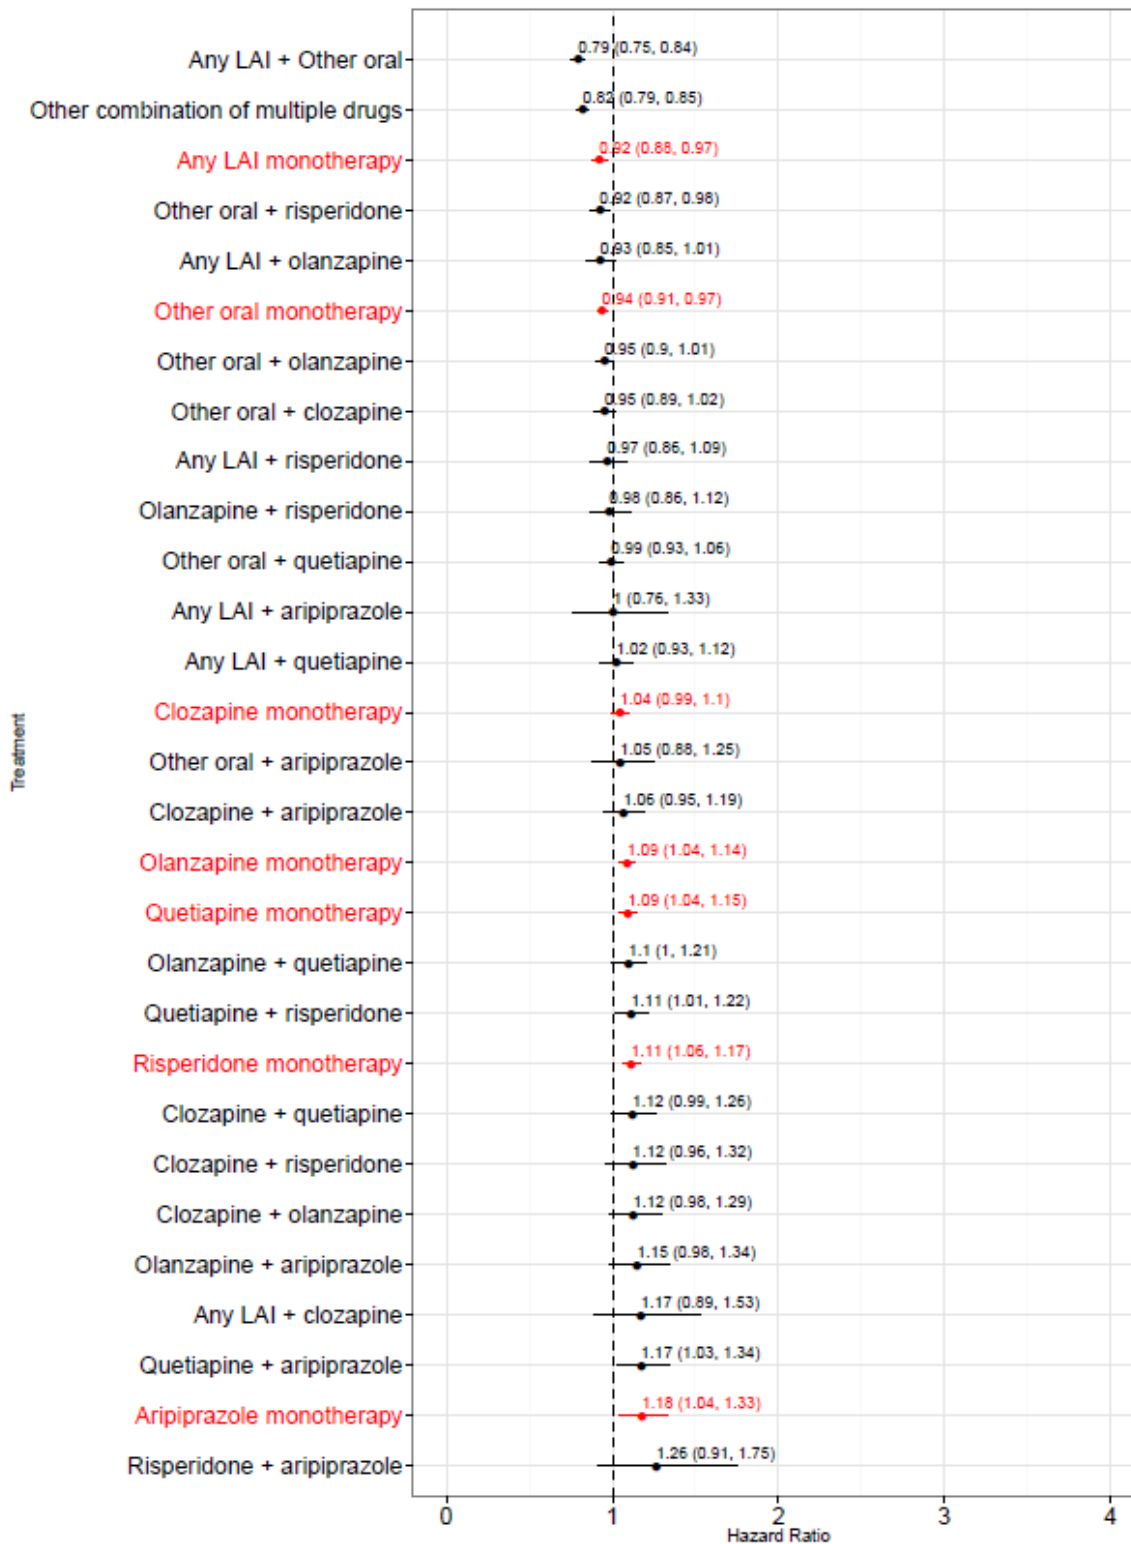

**eFigure 5.** Risk of Death During Specific Antipsychotic Treatments Compared With No Use of Antipsychotic in the Total Cohort (Between-Individual Analysis). Hospital periods with over 7 days duration were censored. Monotherapies are highlighted in red.

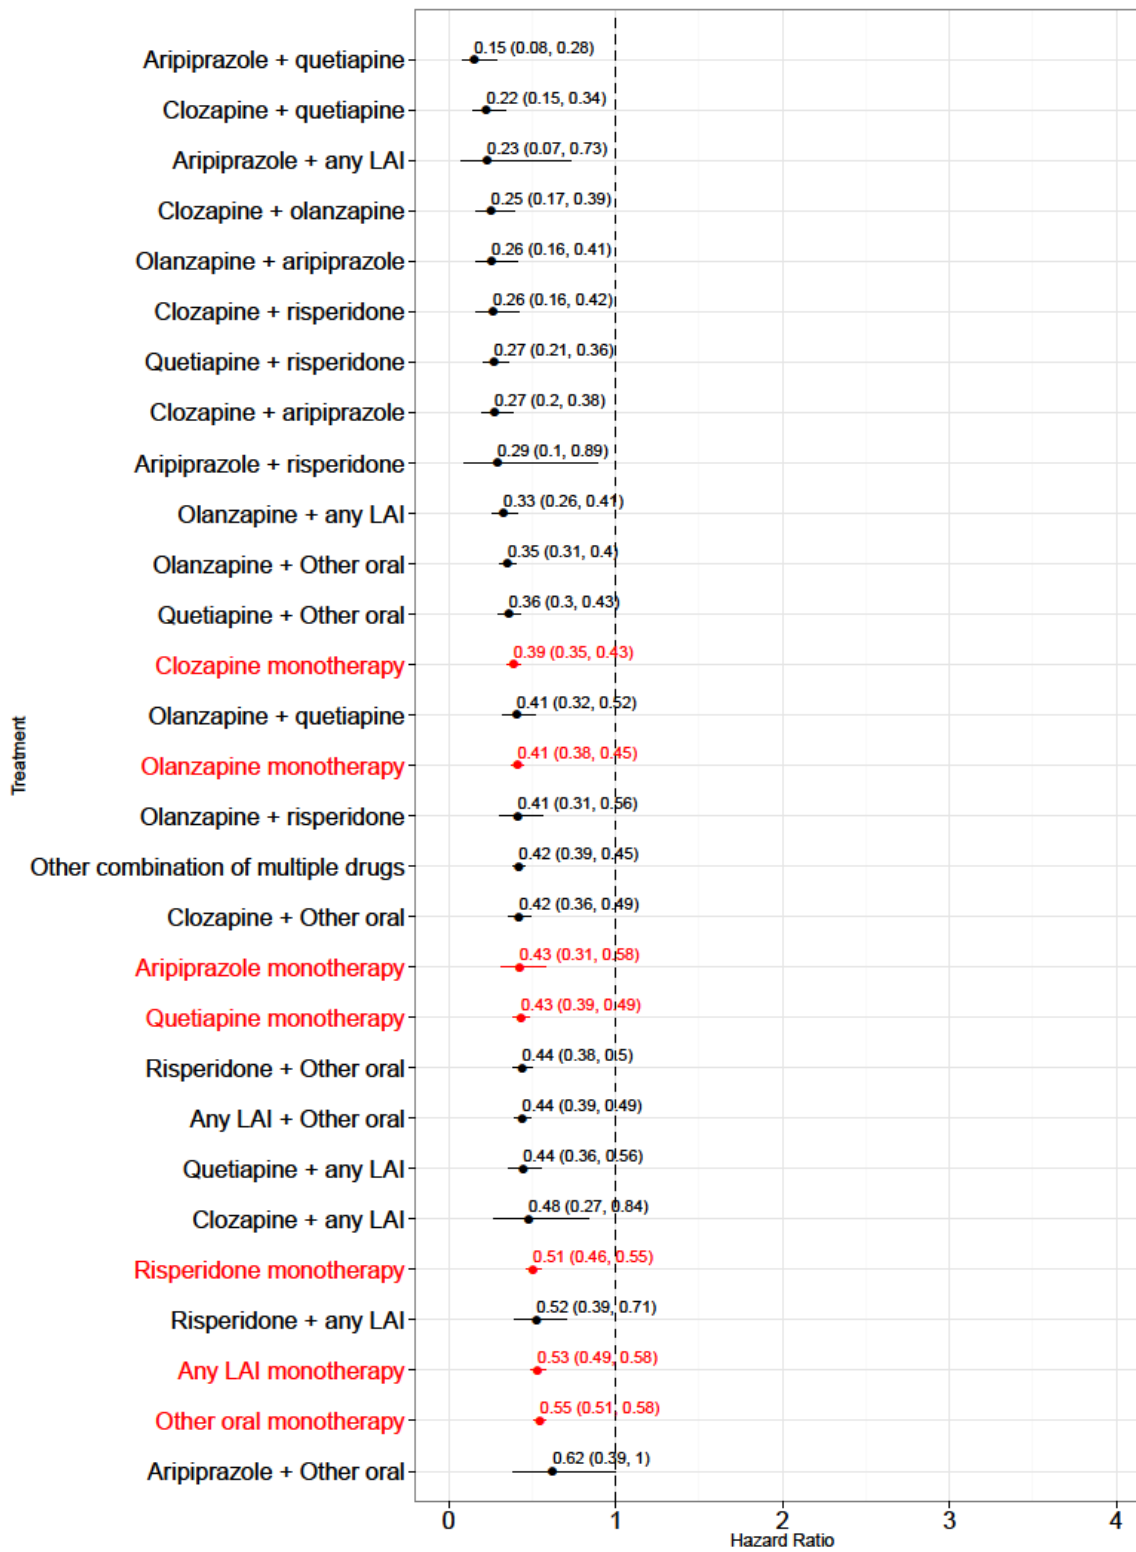

**eFigure 6.** Risk of Psychiatric Hospitalization During Specific Antipsychotic Treatments Compared With No Use of Antipsychotic in the Total Cohort (Between-Individual Analysis). Monotherapies are highlighted in red.

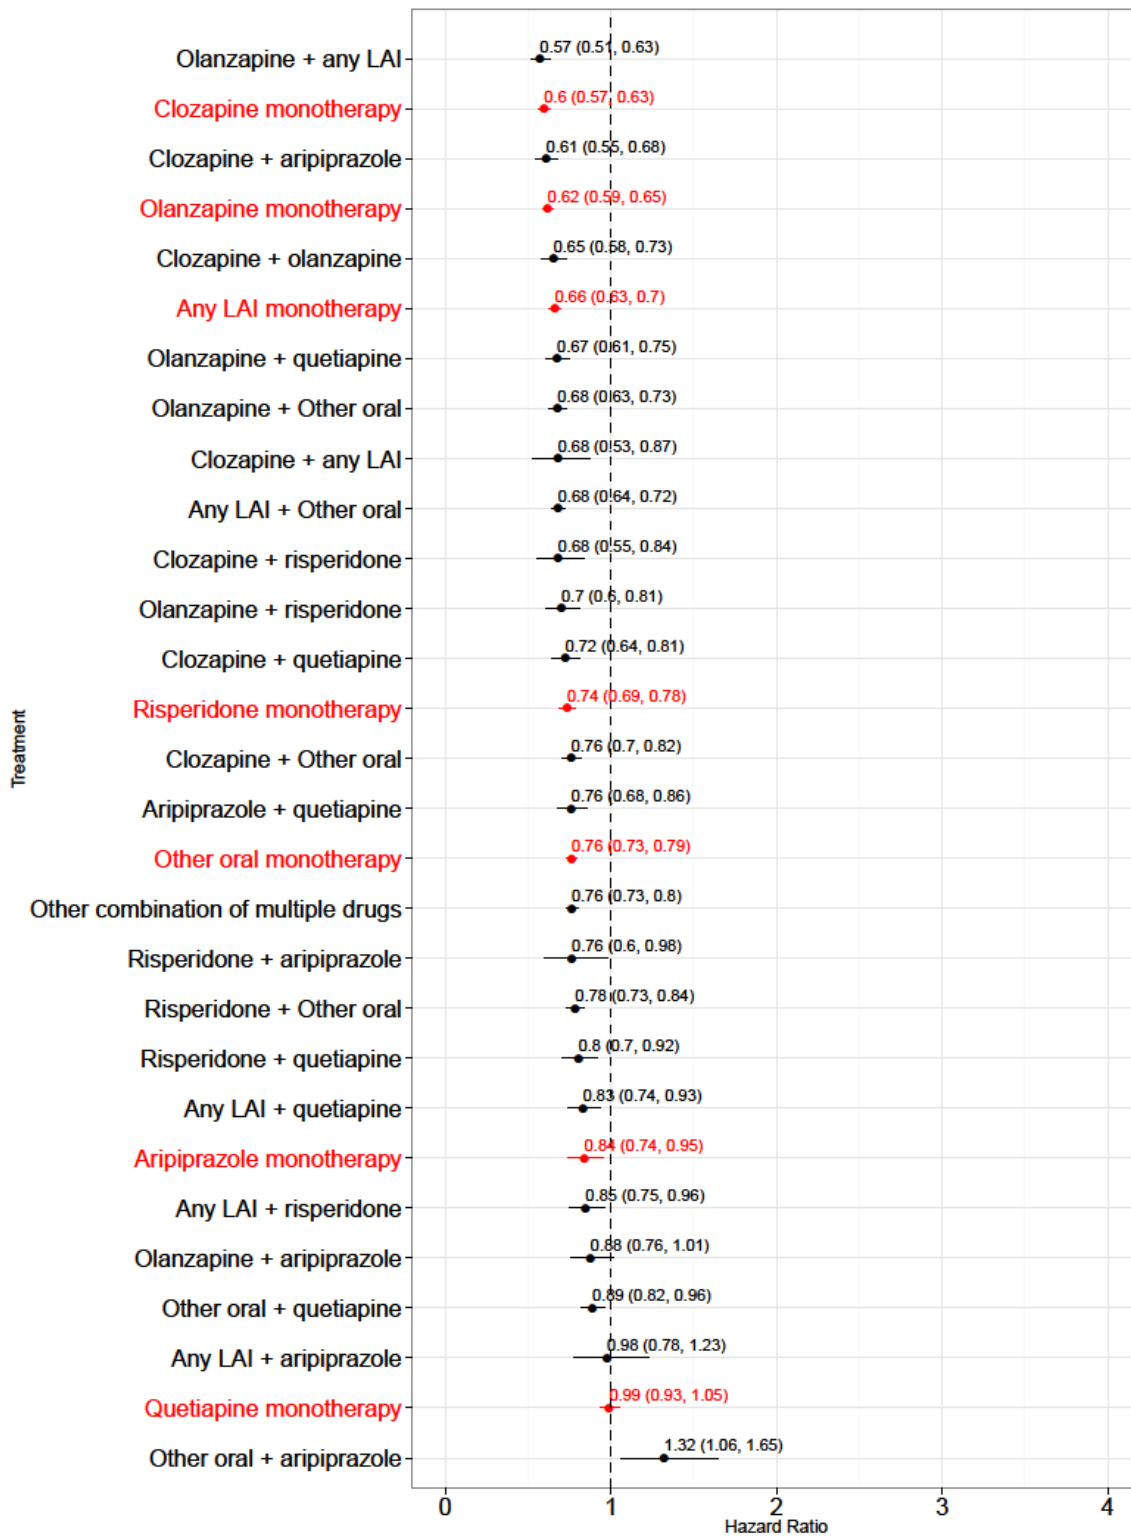

**eFigure 7.** Risk of Psychiatric Re-Hospitalization During Specific Treatments Compared With No Antipsychotic Treatment in the Incident Cohort (Between-Individual Analyses). Monotherapies are highlighted in red.

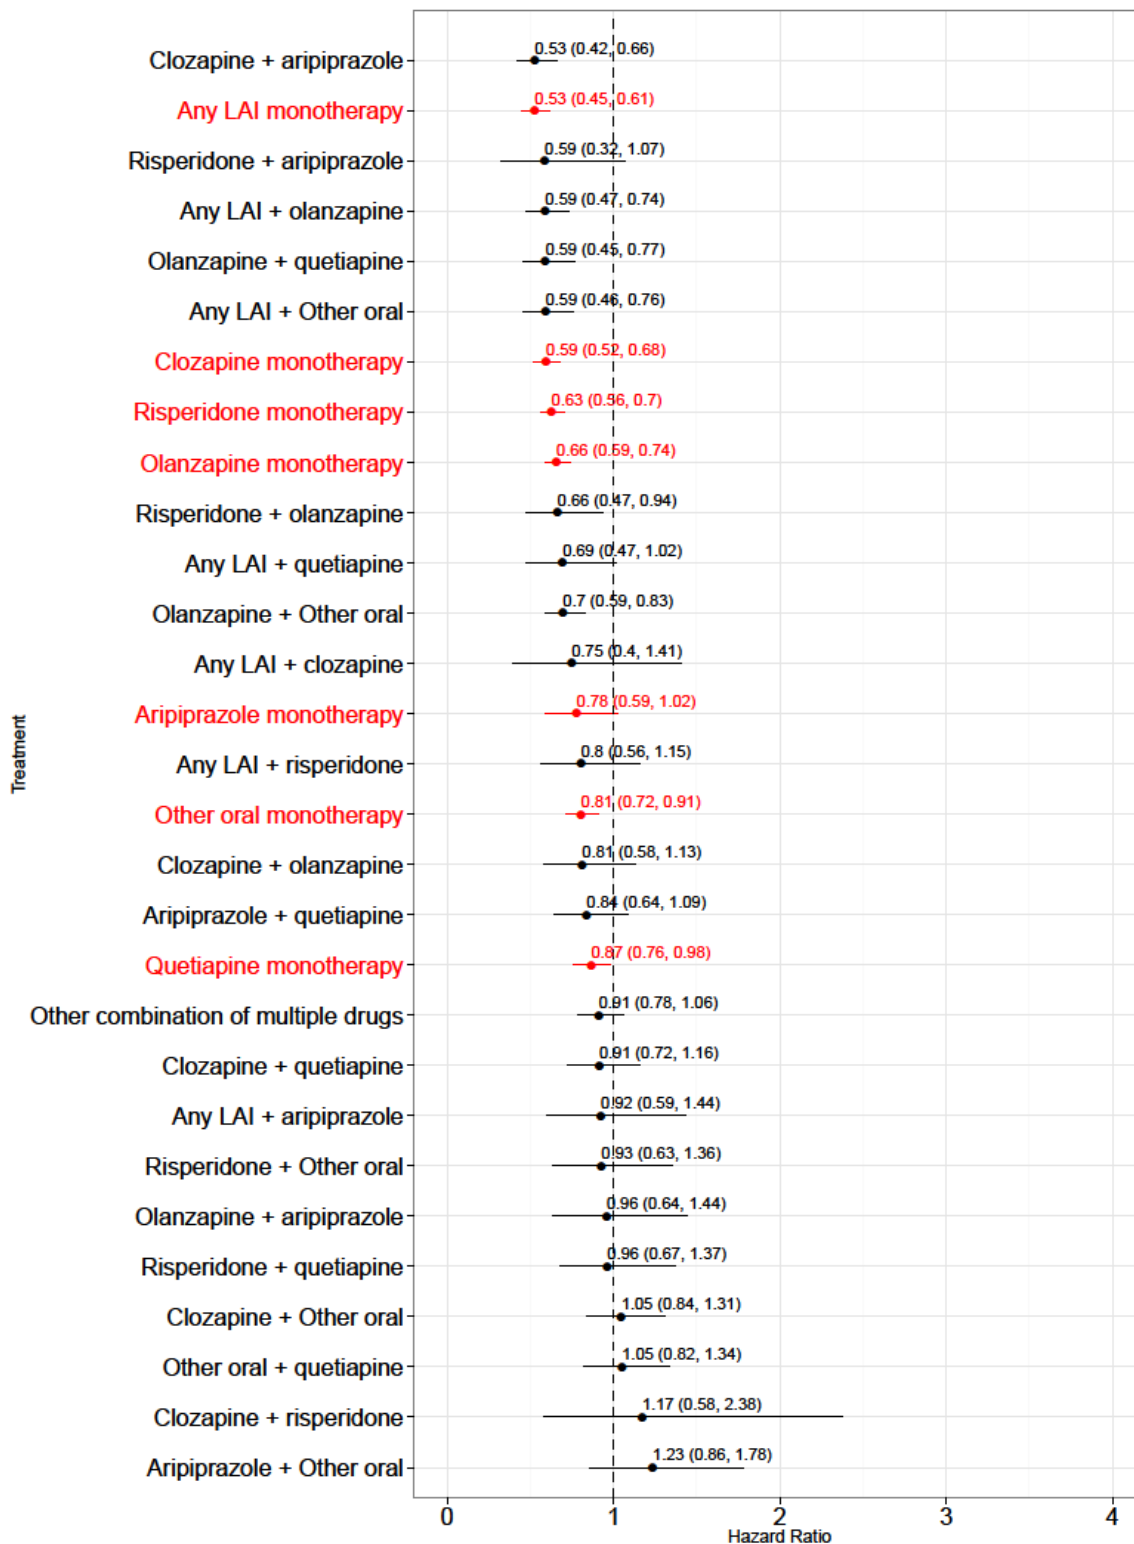

## eReferences

1. Taipale H, Mehtälä J, Tanskanen A, Tiihonen J. Comparative effectiveness of antipsychotic drugs for rehospitalization in schizophrenia - a nationwide study with 20-year follow-up. *Schizophr Bull*. 2018;44(6):1381-1387 doi: 10.1093/schbul/sbx176.
2. Tiihonen J, Tanskanen A, Taipale H. 20-year nationwide follow-up study on discontinuation of antipsychotic treatment in first-episode schizophrenia. *Am J Psychiatry*. 2018;175(8):765-773.doi: 10.1176/appi.ajp.2018.17091001.
